# Supplementary material
Source: publisher figshare collection journal article supplement (https://acs.figshare.com/ndownloader/files/4592728)
Supplement: Supplementary file 1 [file 4592728]

**The Role of Attractive van der Waals Forces in the Catalysis of Michael Addition by a Phenyl  
Decorated Uranyl Salophen Complex.**

*Antonella Dalla Cort, Luigi Mandolini,<sup>\*</sup> and Luca Schiaffino*

Dipartimento di Chimica and IMC-CNR Sezione Meccanismi di Reazione, Università La Sapienza,  
Box 34 Roma 62, 00185 Roma, Italy.

e-mail: luigi.mandolini@uniroma1.it

**Supporting Information**

**INDEX**

|                                                                                                                          |       |
|--------------------------------------------------------------------------------------------------------------------------|-------|
| Figure 1S. Kinetic profiles for addition of 2-carboethoxy-cyclopentanone to MVK.                                         | p. S2 |
| Figure 2S. Spectrophotometric titration of compound <b>2b</b> with compound <b>3</b> .                                   | p. S3 |
| Figure 3S. Spectrophotometric titration of compound <b>2b</b> with compound <b>4</b> .                                   | p. S4 |
| Figure 4S. <sup>1</sup> H NMR spectra of mixtures of <b>2b</b> , <b>3</b> , and Et <sub>3</sub> N in CDCl <sub>3</sub> . | p. S5 |
| Figure 5S. <sup>1</sup> H NMR spectra of mixtures of <b>3</b> and Et <sub>3</sub> N in CDCl <sub>3</sub> .               | p. S6 |
| Figure 6S. <sup>1</sup> H NMR spectrum of compound <b>4</b> .                                                            | p. S7 |

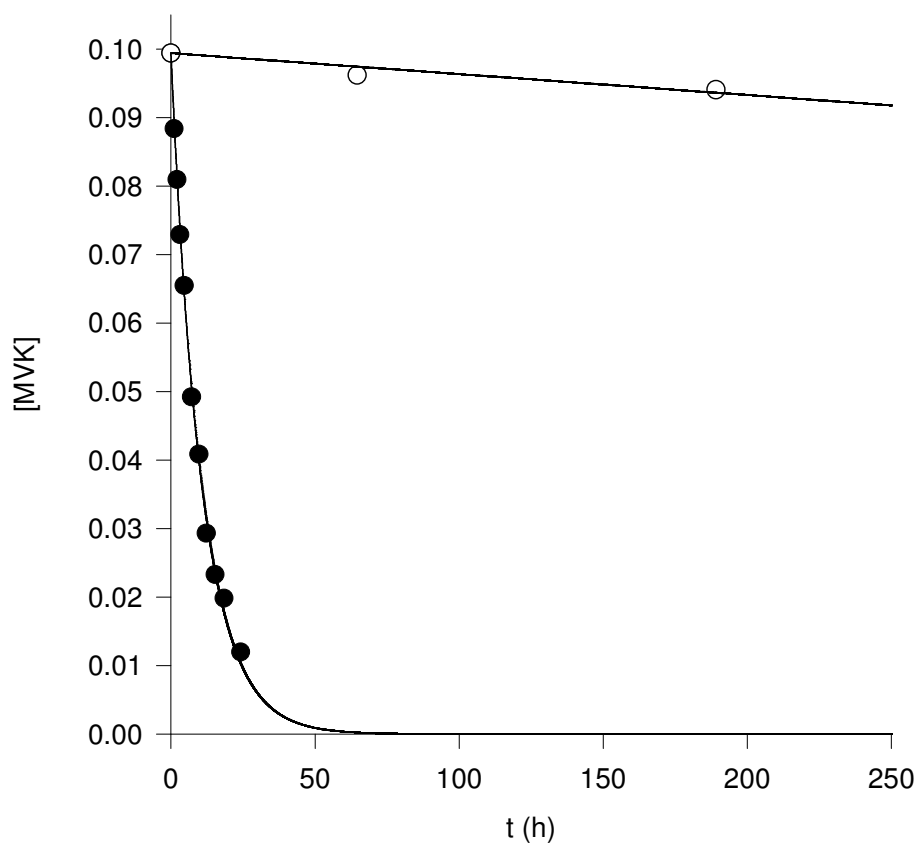

**Figure 1S.** Time-concentration profiles for Michael addition of 2-carboethoxy-cyclopentanone to MVK in  $\text{CDCl}_3$ , at  $25^\circ\text{C}$ .  $[\text{MVK}] = 0.10\text{ M}$ ,  $[\text{2-carboethoxy-cyclopentanone}] = 0.20\text{ M}$ , and  $[\text{Et}_3\text{N}] = 5.0 \cdot 10^{-3}\text{ M}$ . (●)  $[\mathbf{2b}] = 2.0 \cdot 10^{-3}\text{ M}$ ; (○) no metal catalyst. The points are experimental and the curves are drawn for clarity purposes only.

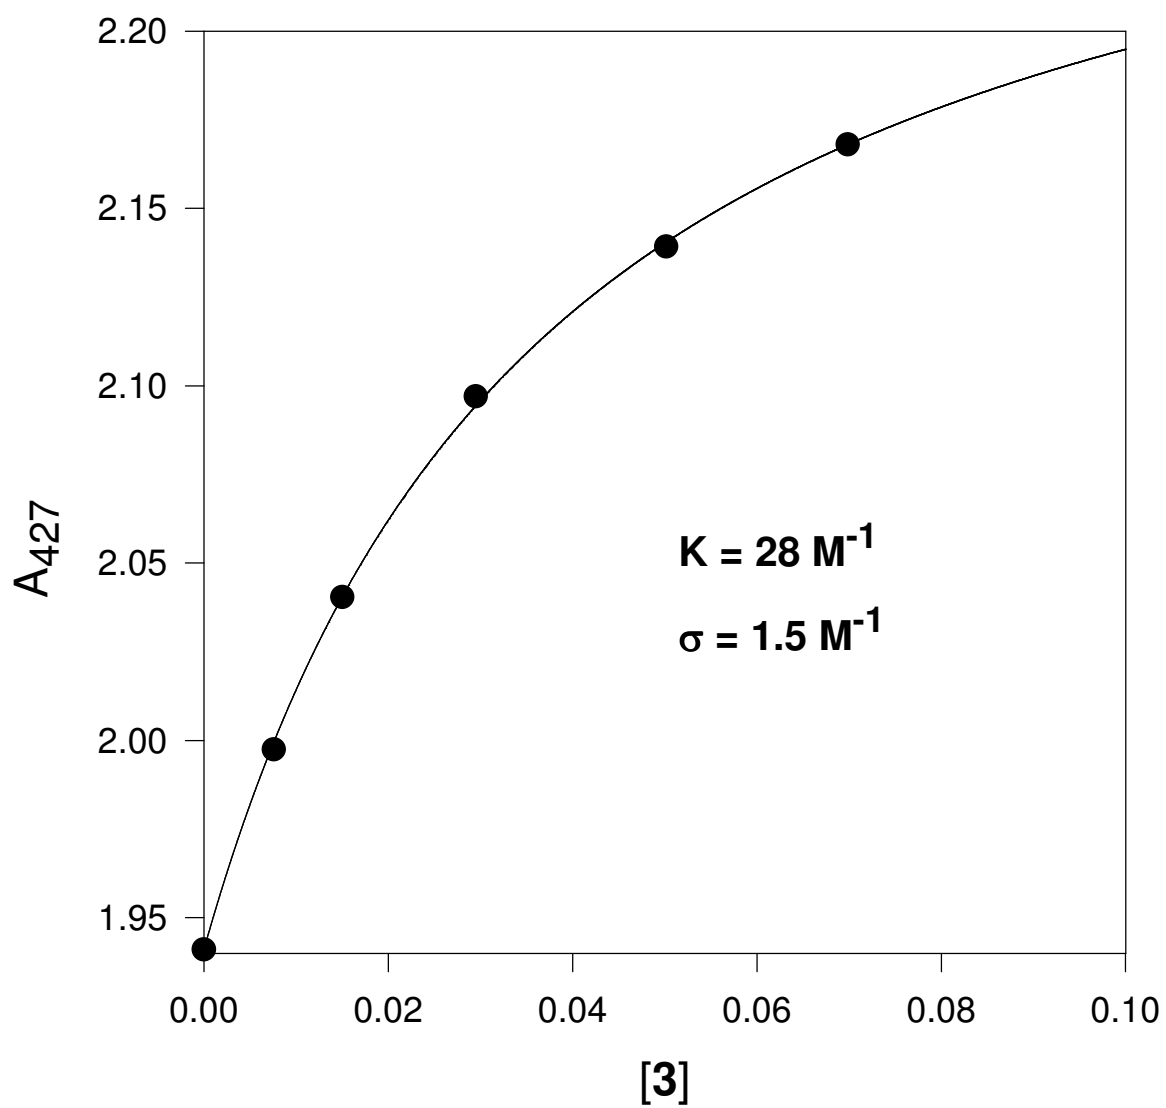

**Figure 2S.** Spectrophotometric titration of compound **2b** with compound **3**.

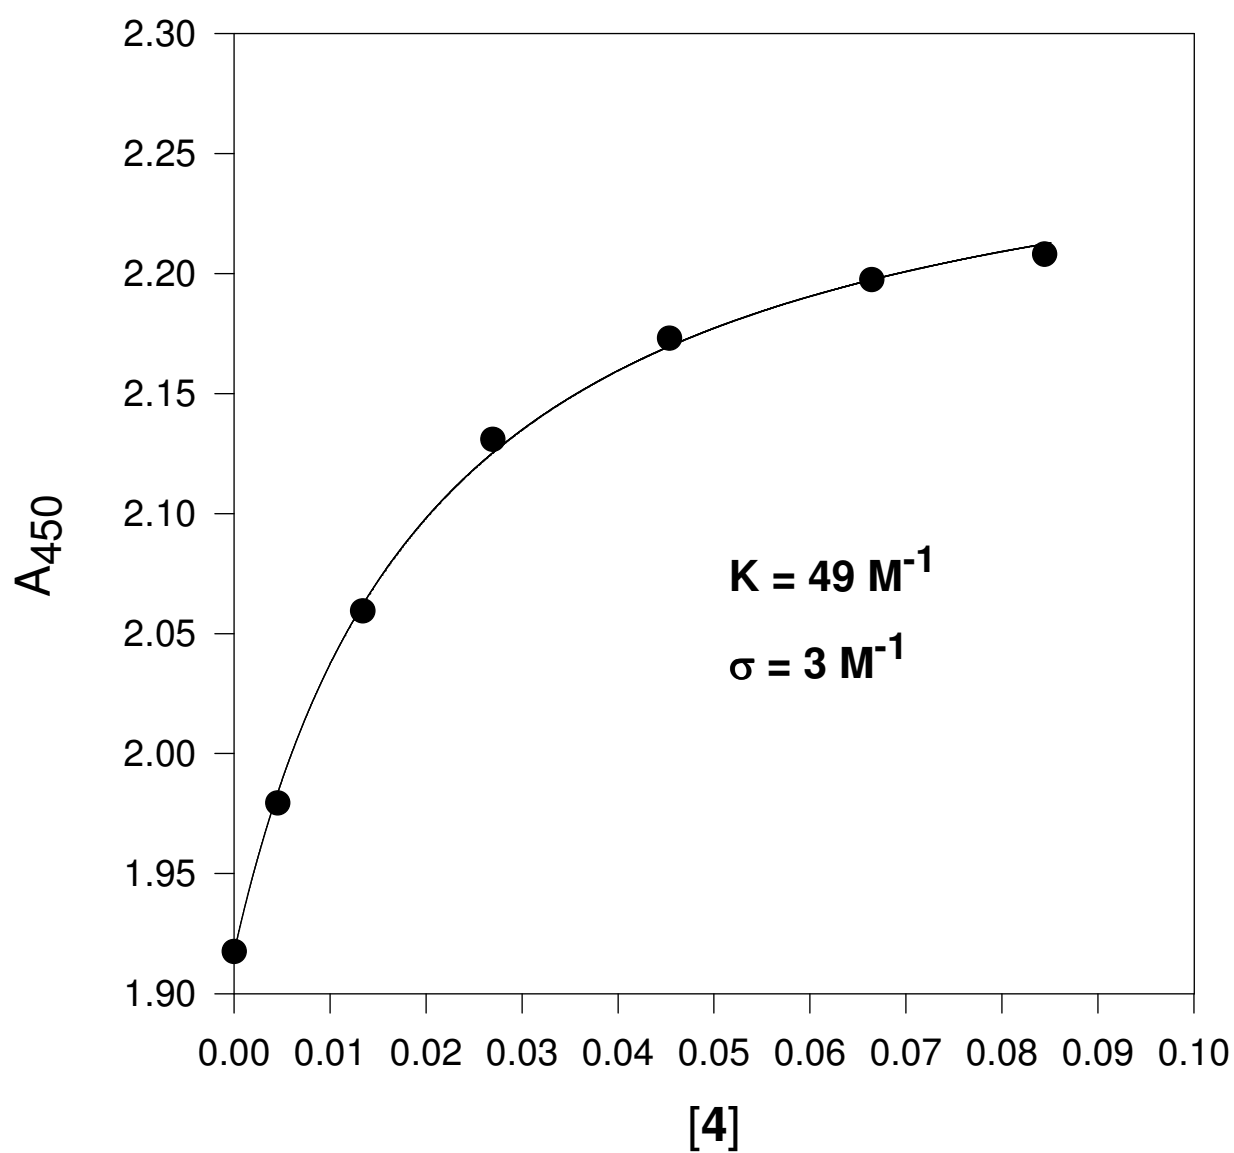

**Figure 3S.** Spectrophotometric titration of compound **2b** with compound **4**.

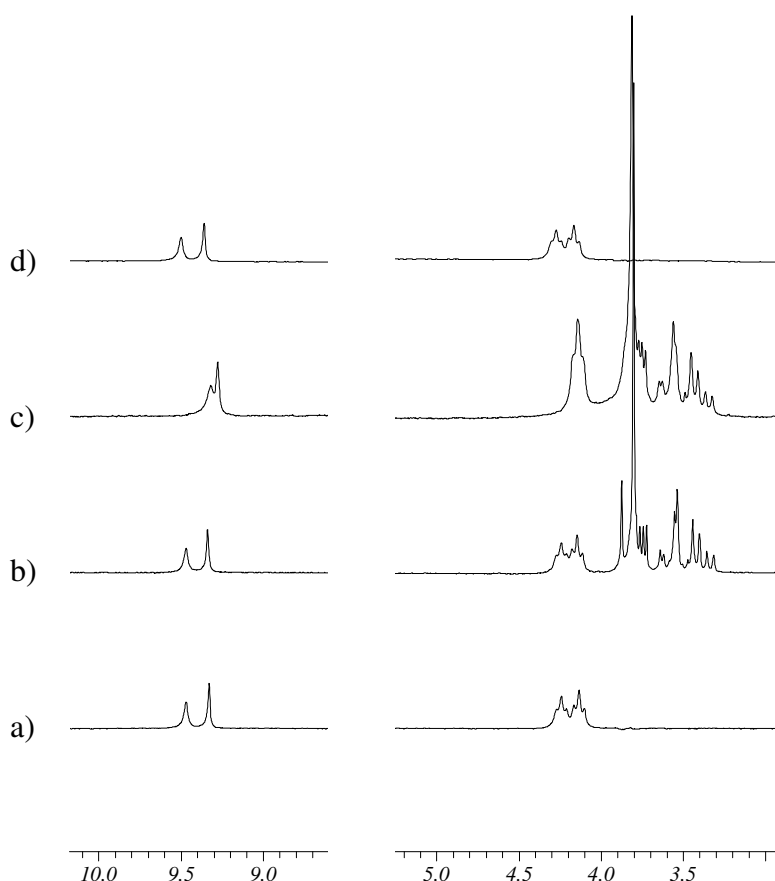

**Figure 4S.** Portions of  $^1\text{H}$  NMR spectral regions of  $\text{CDCl}_3$  solutions of a) compound **2b**; b) **2b** and **3**; c) **2b**, **3**, and  $\text{Et}_3\text{N}$ ; d) **2b** and  $\text{Et}_3\text{N}$ . Concentration of **2b** is always 5 mM; concentrations of **3** and  $\text{Et}_3\text{N}$  are always 10 mM. The signals at 9.5 - 9.3 p.p.m. correspond to the resonances of protons on the imine carbon of **2b**,  $-\text{C}(\text{H})=\text{N}-$ ; the signals at 4.4 – 4.1 p.p.m. correspond to the resonances of protons of the first methylene groups of the alkoxy chains of **2b**,  $-\text{O}-\text{C}(\text{H})_2-$ . It is clearly seen that no changes are produced on the spectrum of **2b** nor upon addition of methyl 1-oxoindane-2-carboxylate **3**, neither upon addition of  $\text{Et}_3\text{N}$ . Evident changes are instead observed when both the  $\beta$ -ketoester **3** and  $\text{Et}_3\text{N}$  are simultaneously present, suggesting that a complex is formed between uranyl-salophen catalyst **2b** and the enolate of **3**.

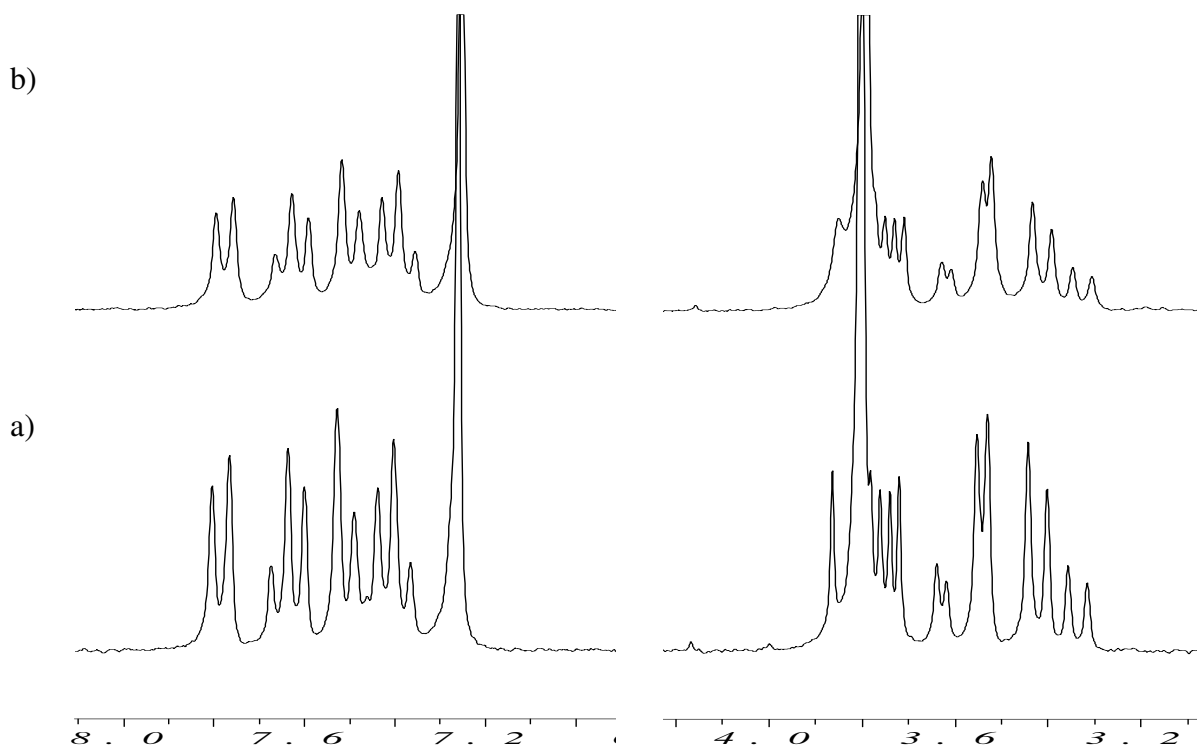

**Figure 5S.** Portions of  $^1\text{H}$  NMR spectral regions of  $\text{CDCl}_3$  solutions of a) 0.011 M compound **3**; b) 0.010 M compound **3** and 0.010 M  $\text{Et}_3\text{N}$ . The two double doublets at 3.7 – 3.3 p.p.m. correspond to the resonances of the protons of the methylene group of methyl 1-oxoindane-2-carboxylate **3**,  $\text{Ar-C(H)}_2\text{-CH}$ . Line broadening in spectrum (b) is due to faster racemisation of the neighbouring chiral carbon atom in the presence of the tertiary base. It is apparent that the  $\beta$ -ketoester is not deprotonated by  $\text{Et}_3\text{N}$ , indicating that spectral changes in the spectrum (c) of Figure 4S are due to the increased acidity of **3** upon complexation with the uranyl-salophen compound **2b**.

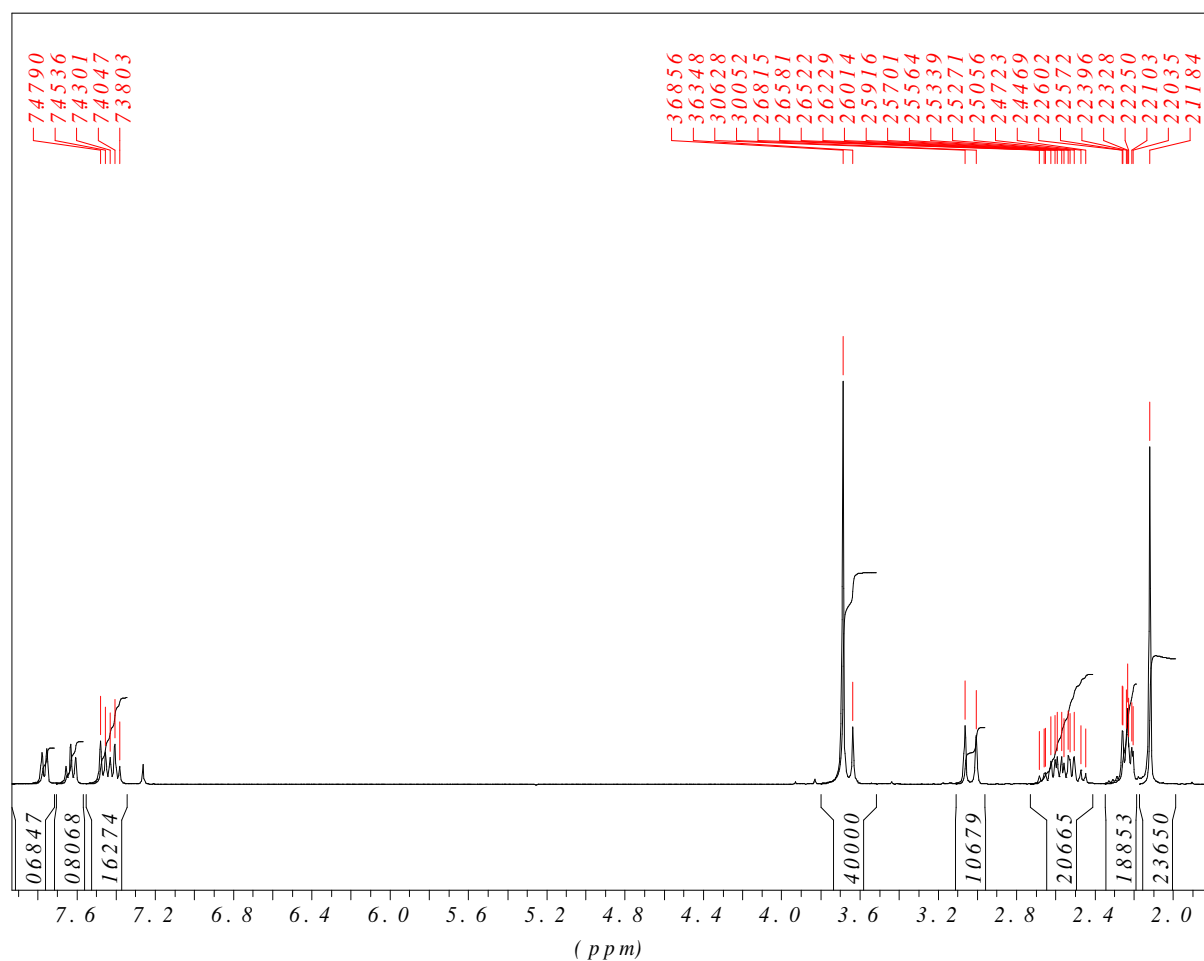

**Figure 6S.**  $^1\text{H}$  NMR spectrum of compound **4** at 200 MHz in  $\text{CDCl}_3$ .  $\delta$  (p.p.m): 7.76 (d, 1H), 7.63 (t, 1H), 7.48-7.38 (m, 2H), 3.69-3.63 (m, 4H), 3.03 (d, 1H), 2.68-2.45 (m, 2H), 2.26-2.20 (m, 2H), 2.12 (s, 3H).
